# Supplementary material for: Multi-omics signatures of the human early life exposome
Source: bioRxiv or medRxiv preprint supplement (doi:10.1101/2021.05.04.21256605), 2021-05-07

### A Heterogeneity of pregnancy exposome – omics associations

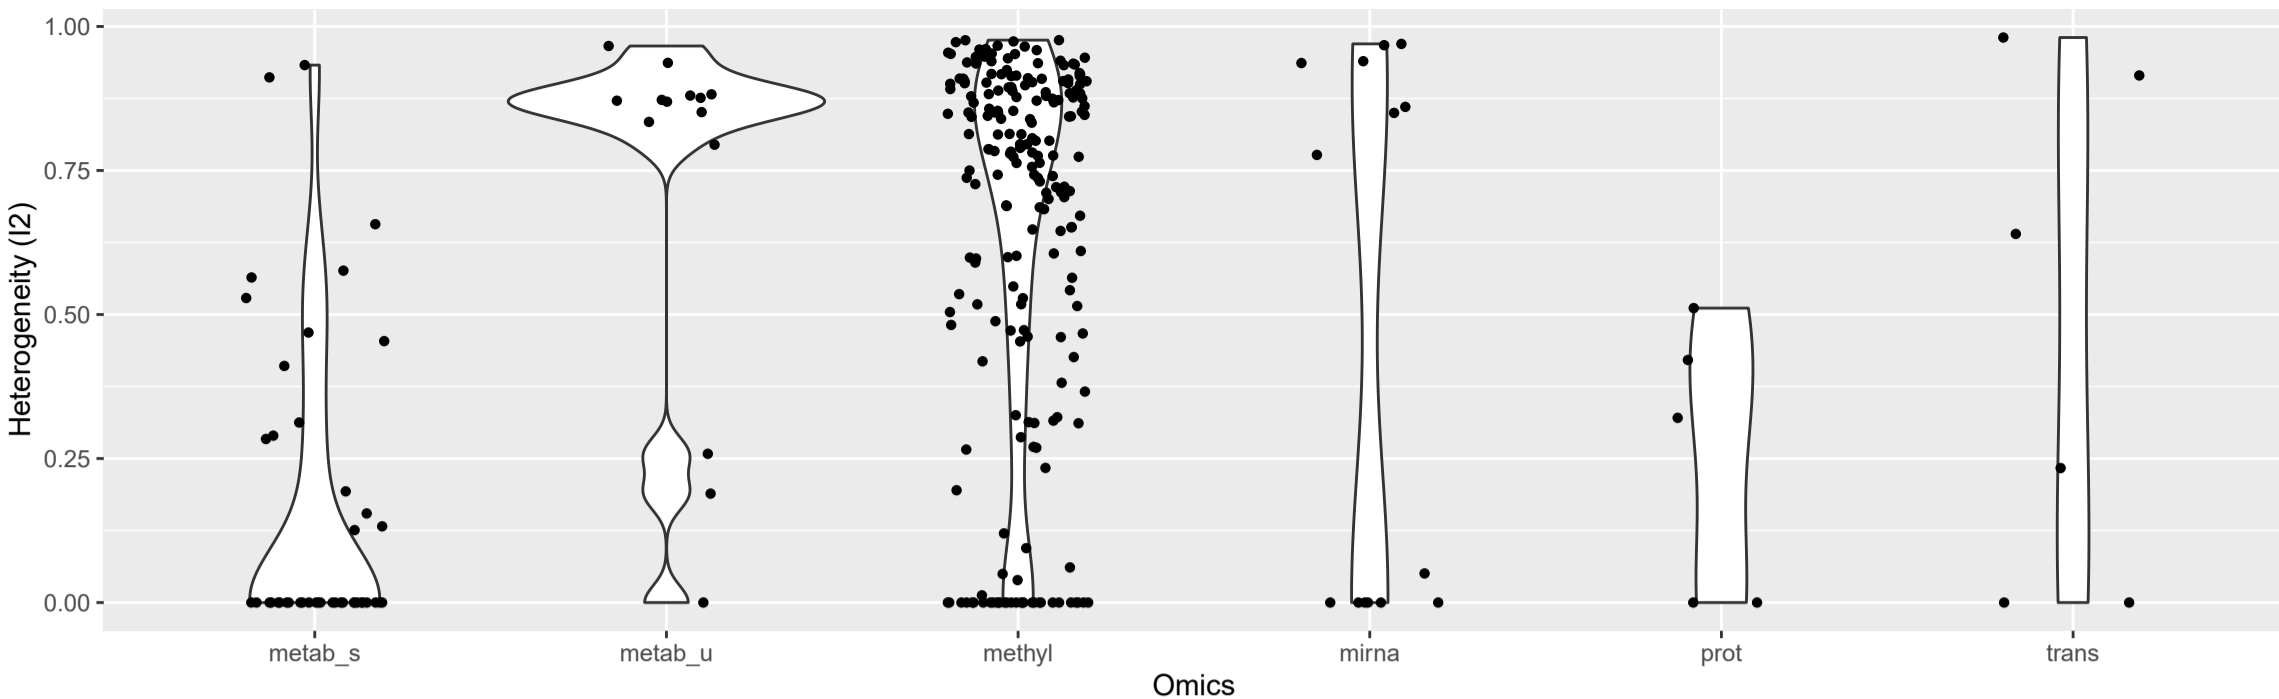

### B Heterogeneity of childhood exposome – omics associations

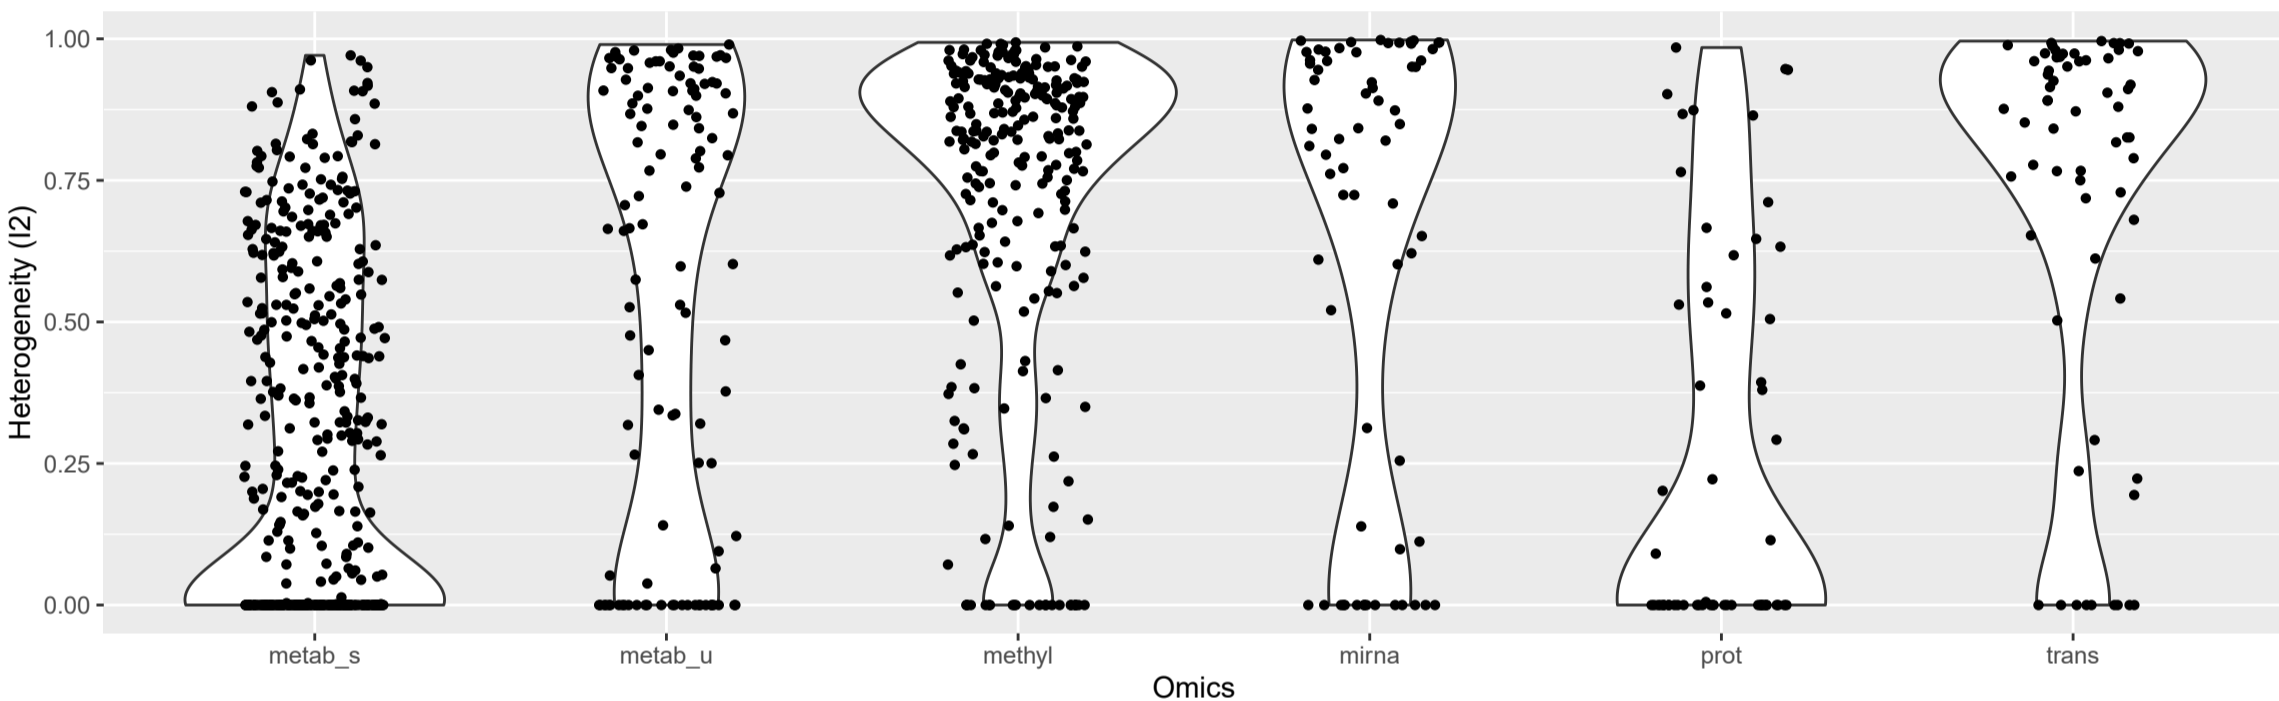

### C

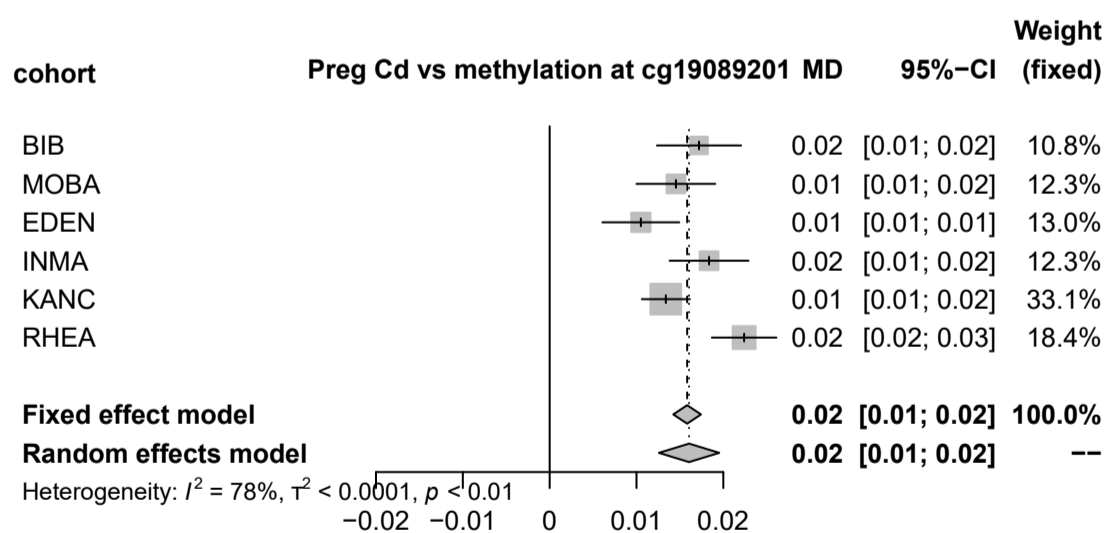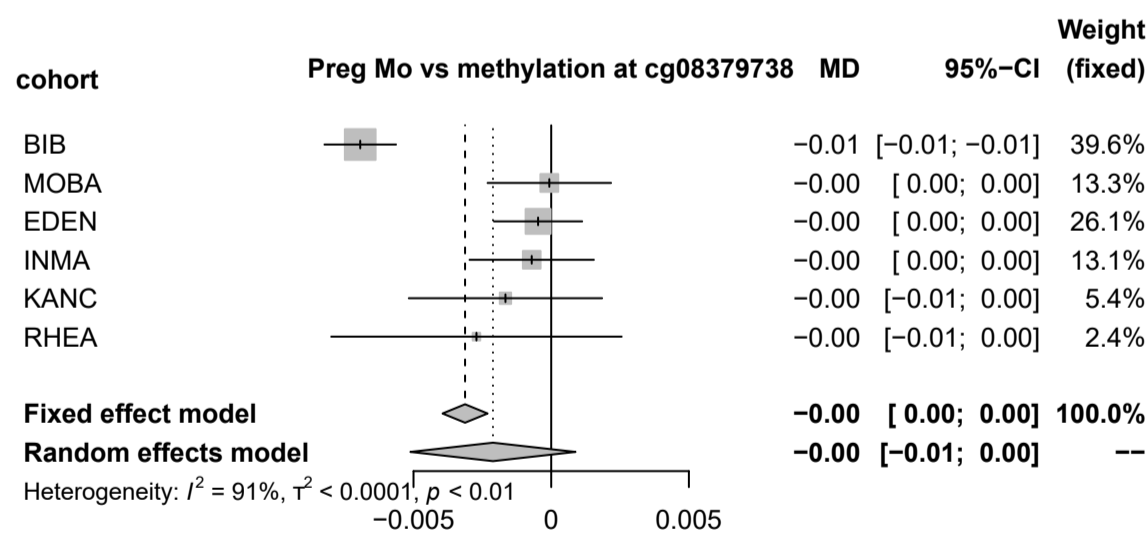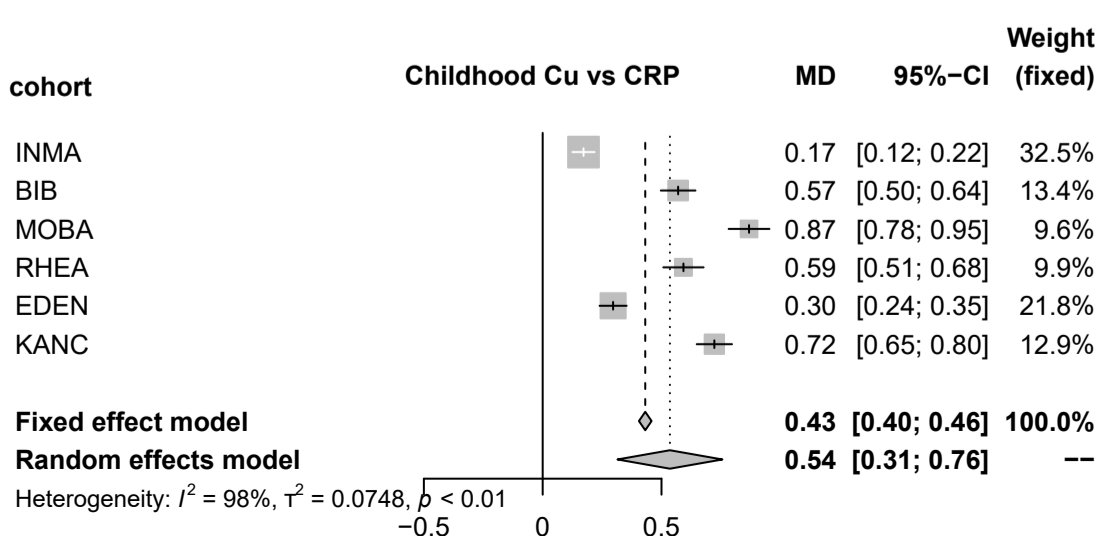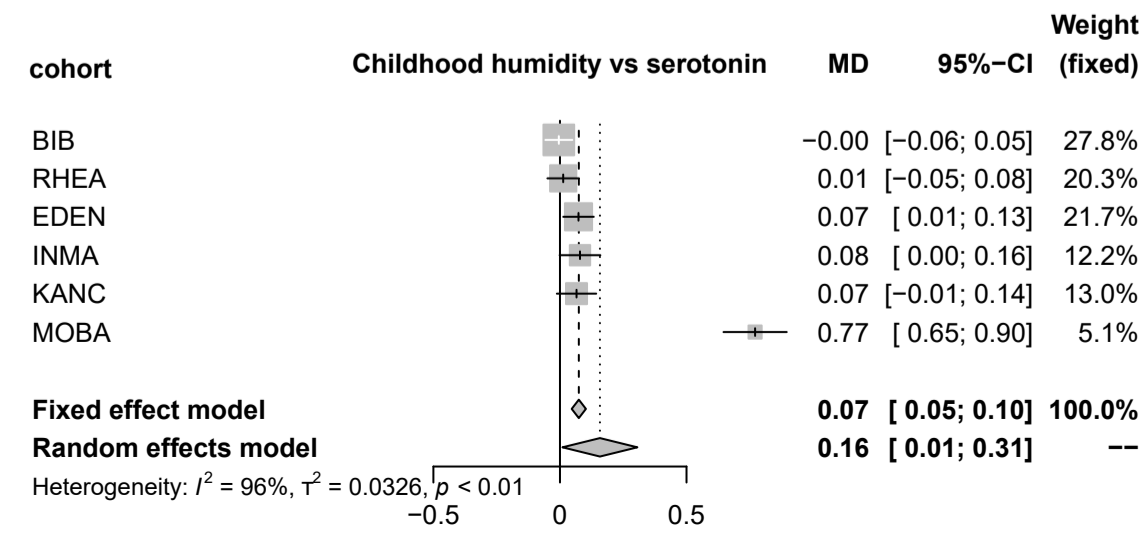

Supplement: Supplementary file [file media-4.pdf]
