# Supplementary material for: Multi-omics signatures of the human early life exposome
Source: bioRxiv or medRxiv preprint supplement (doi:10.1101/2021.05.04.21256605), 2021-05-07

Maternal Smok (all) vs Maternal Cd (all)

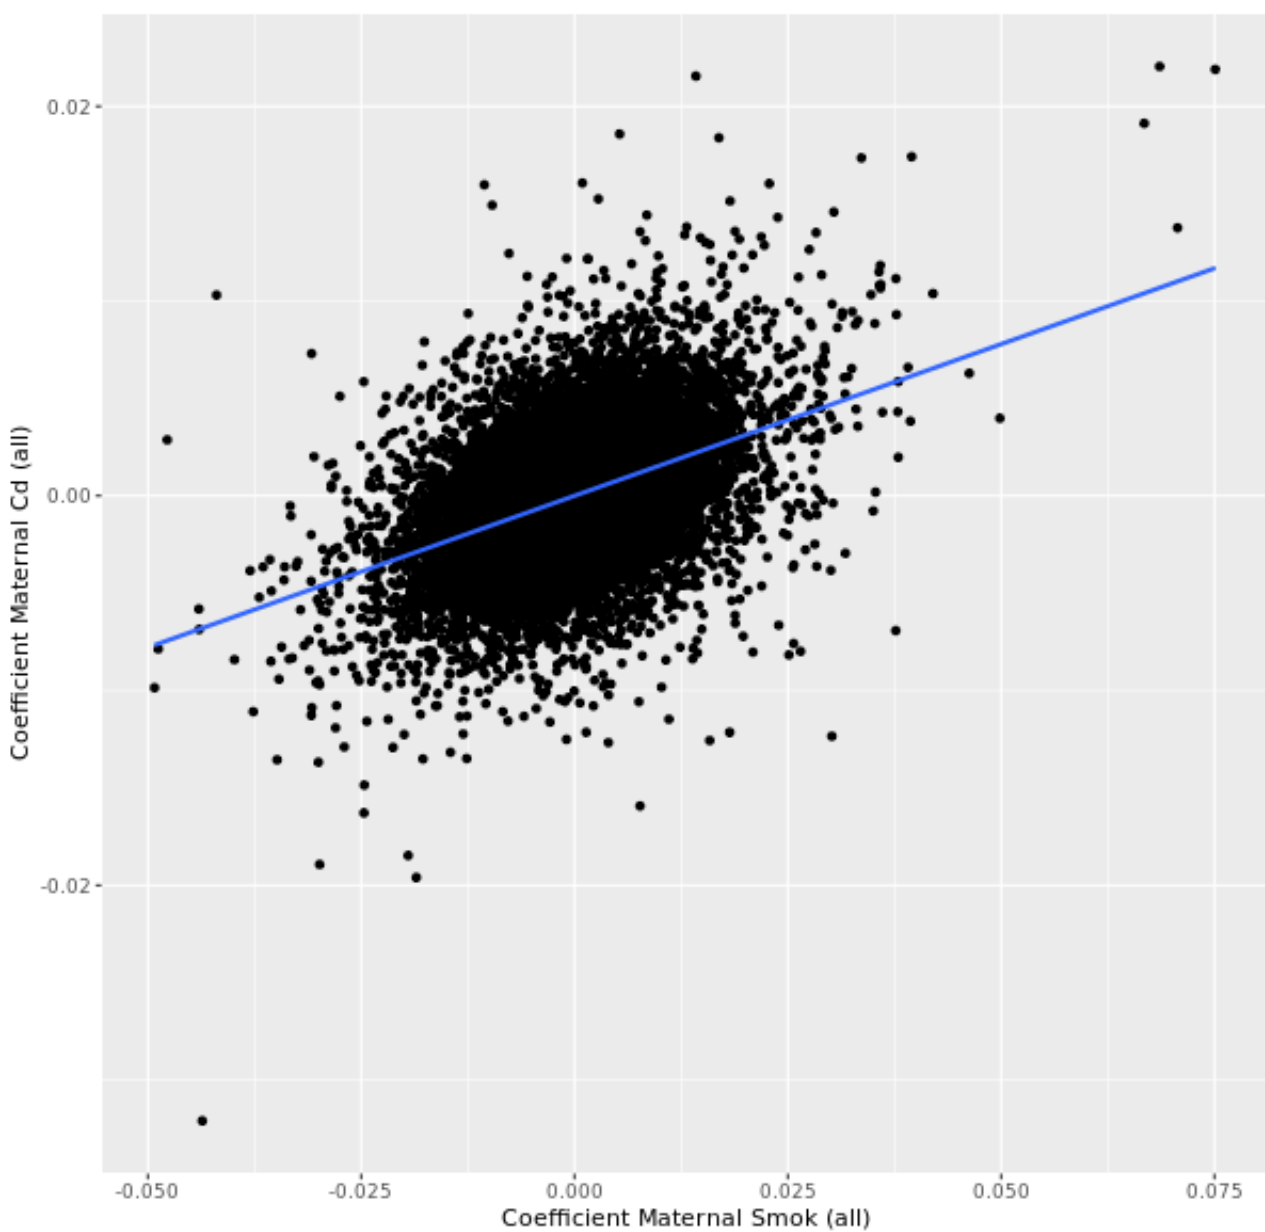

Maternal Smok (all) vs Maternal Cd (all)

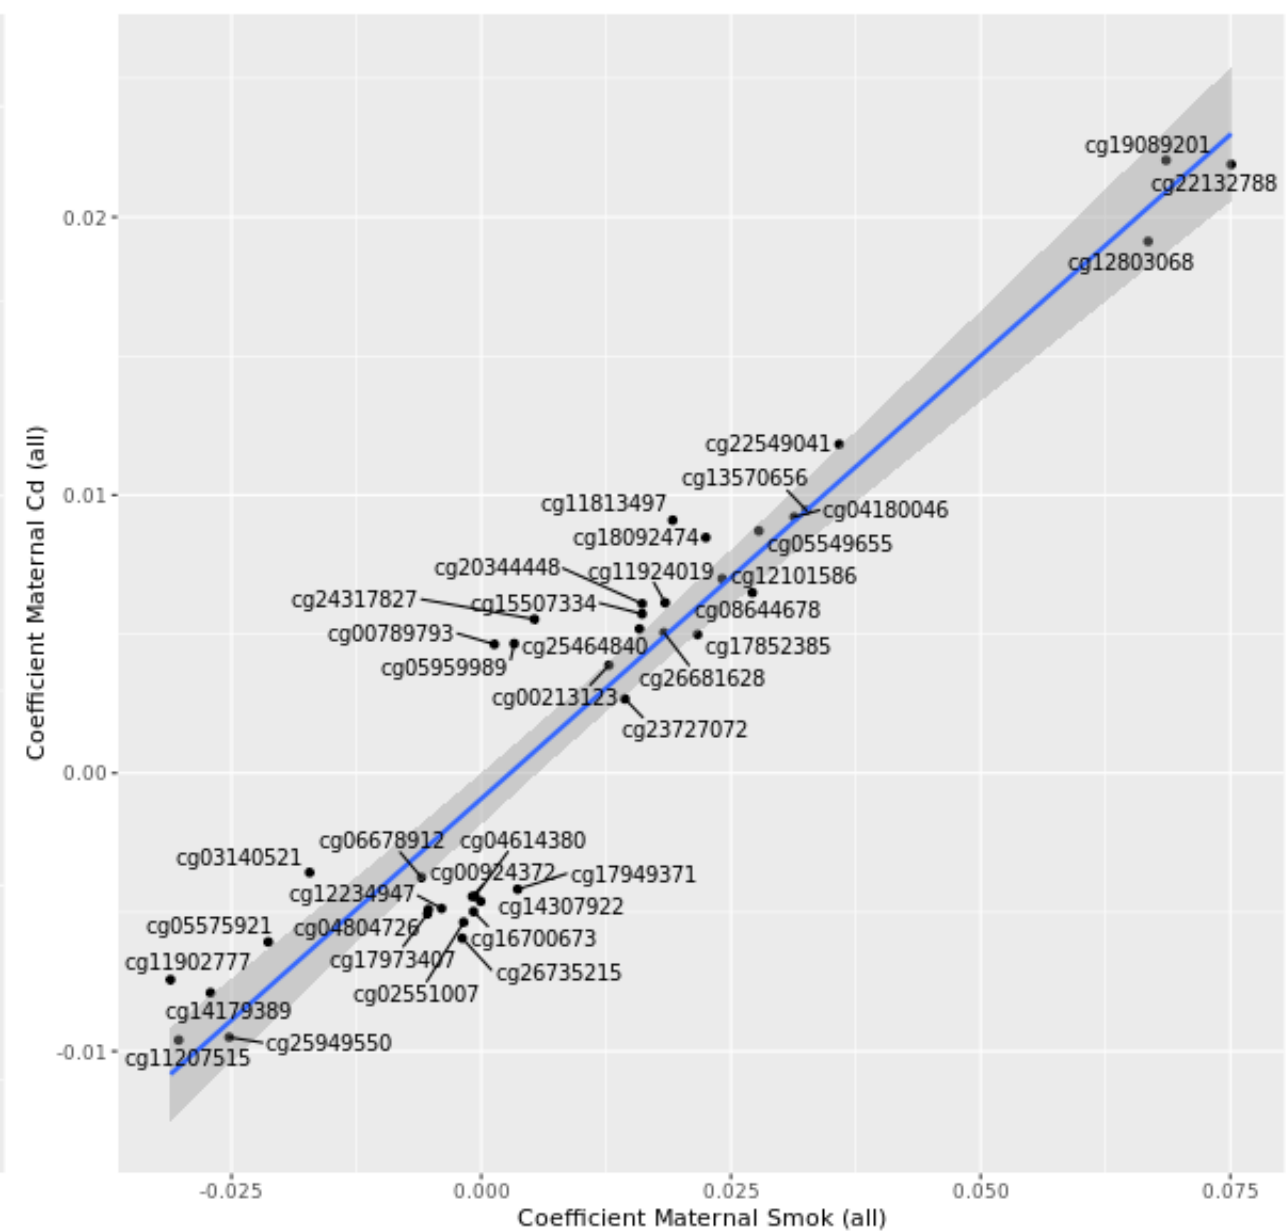

Maternal Smok (all) vs Maternal Cd (NE)

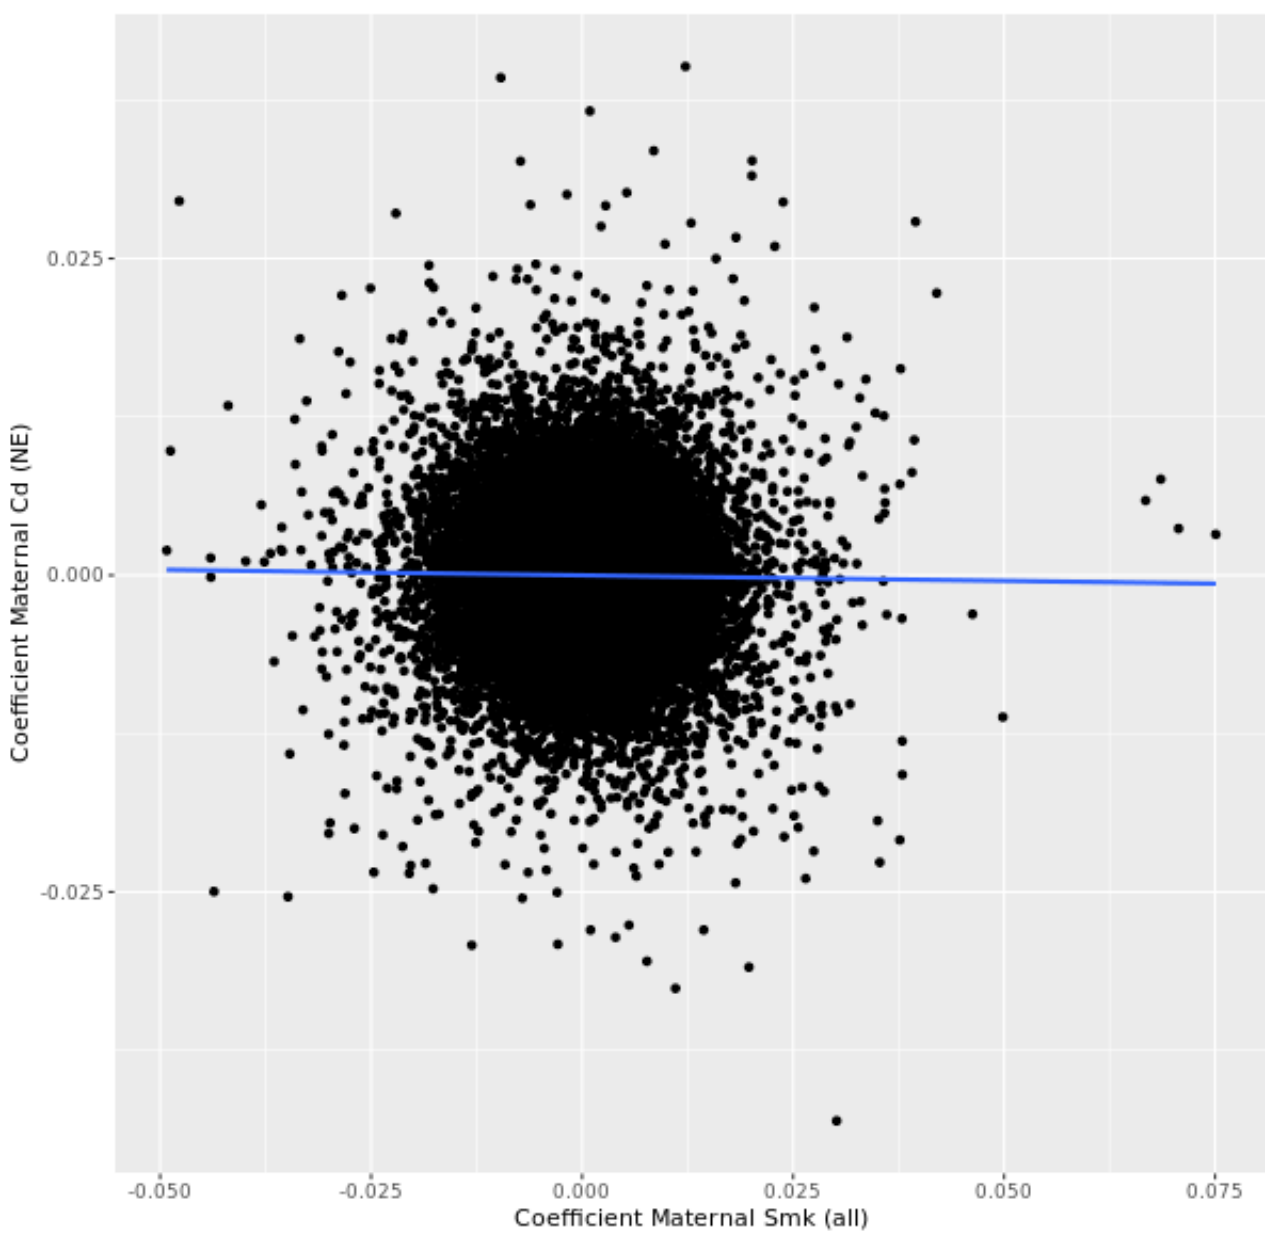

Maternal Smok (all) vs Maternal Cd (NE)

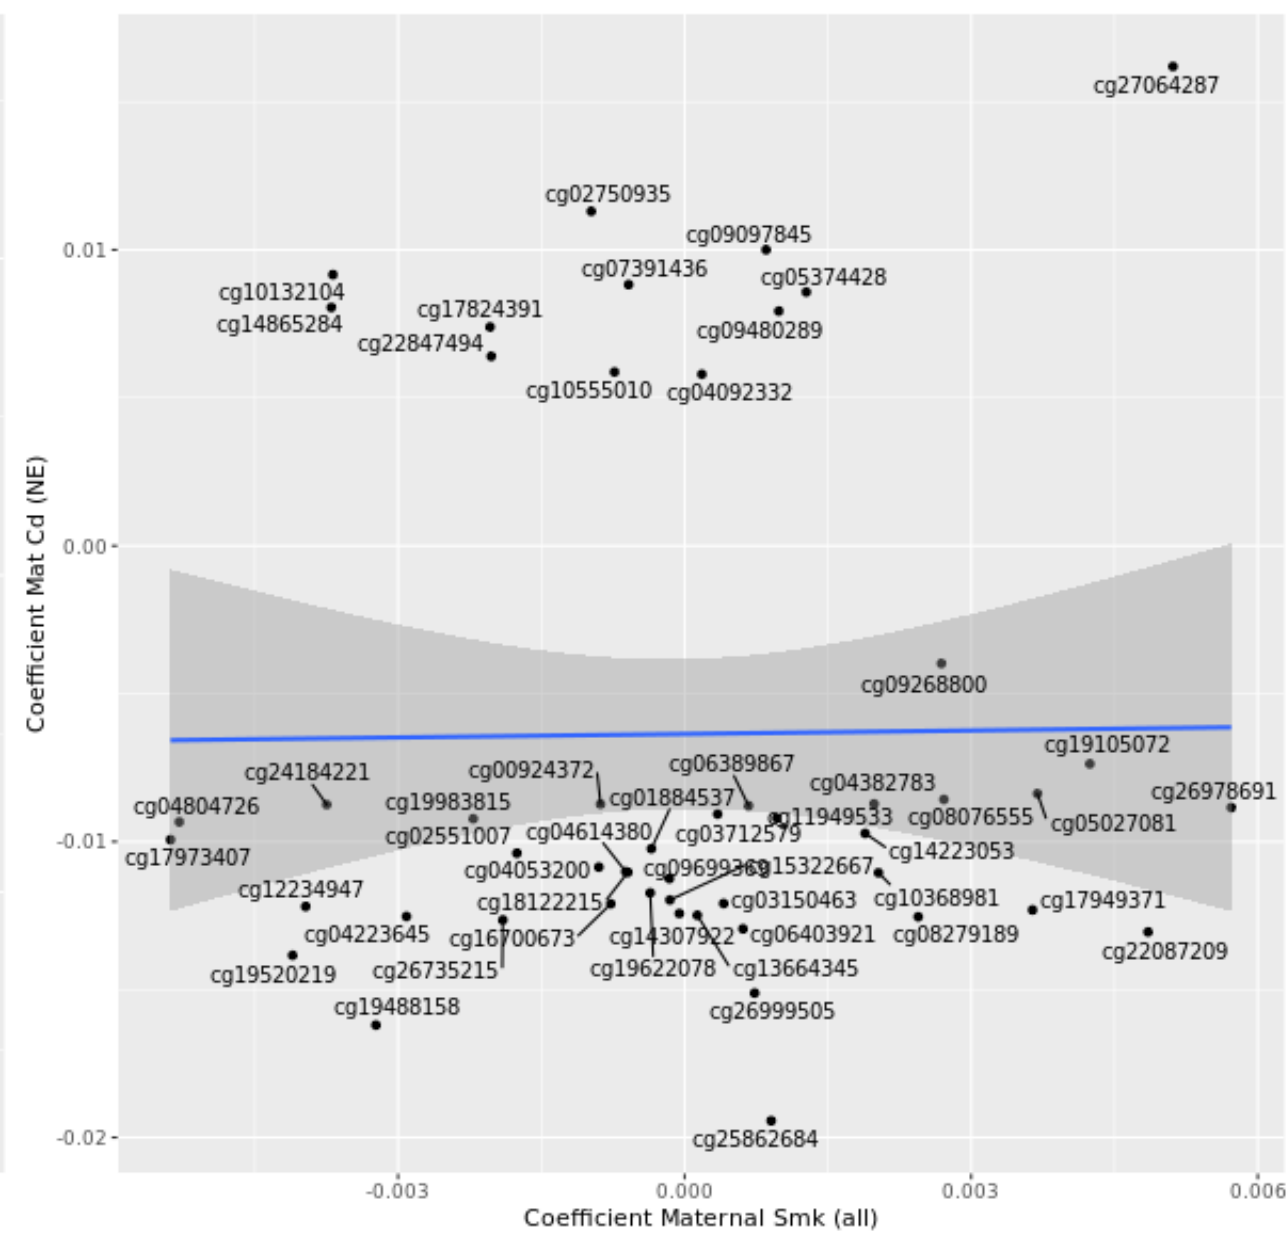

Supplement: Supplementary file [file media-13.pdf]
